# Supplementary material
Source: HighWire-hosted journal article supplement (http://d2538ggaoe6cji.cloudfront.net/highwire/filestream/44730/field_highwire_adjunct_files/2/150227-3.pdf)
Supplement: 150227-3.pdf [file 150227-3.pdf]

**Supplementary Table 2: Virion proteins of JBD26, DMS3, and JBD88a**

| JBD26 |              | Protein                 | DMS3 |              | Identity        | JBD88a           |                | Identity        | Function <sup>2</sup>                          |
|-------|--------------|-------------------------|------|--------------|-----------------|------------------|----------------|-----------------|------------------------------------------------|
| ORF   | Accession ID | Length<br>(amino acids) | ORF  | Accession ID | to JBD26<br>(%) | ORF <sup>1</sup> | Accession ID   | to JBD26<br>(%) |                                                |
| 33    | AEY99445.1   | 528                     | 27   | YP_950451.1  | 78              | 29               | YP_007392436.1 | 78              | portal protein                                 |
| 34    | AEY99435.1   | 428                     | 28   | YP_950452.1  | 87              | 30               | YP_007392437.1 | 86              | homologue of phage Mu gpF                      |
| 40    | AEY99460.1   | 368                     | 32   | YP_950456.1  | 76              | 36               | YP_007392443.1 | 64              | protease/scaffold                              |
| 41    | AEY99438.1   | 302                     | 33   | YP_950457.1  | 42              | 37               | YP_007392444.1 | 42              | major head                                     |
| 45    | AEY99483.1   | 138                     | 36   | YP_950460.1  | 68              | 40               | YP_007392447.1 | 68              | head-tail joining                              |
| 46    | AEY99456.1   | 159                     | 37   | YP_950461.1  | 71              | 41               | YP_007392448.1 | 70              | tail terminator                                |
| 48    | AEY99480.1   | 256                     | 39   | YP_950463.1  | 96              | 43               | YP_007392450.1 | 55              | tail tub                                       |
| 51    | AEY99434.2   | 1186                    | 41   | YP_950465.1  | 29              | 45               | YP_007392452.1 | 34              | tape measure                                   |
| 52    | AEY99430.1   | 318                     | 42   | YP_950466.1  | 98              | 46               | YP_007392453.1 | 95              | putative tail protein                          |
| 53    | AEY99452.1   | 307                     | 43   | YP_950467.1  | 99              | 47               | YP_007392454.1 | 87              | putative tail protein                          |
| 54    | AEY99446.1   | 567                     | 44   | YP_950468.1  | 98              | 48               | YP_007392455.1 | 97              | tail protein; phage lambda gpM-like            |
| 55    | AEY99474.1   | 273                     | 45   | YP_950469.1  | 90              | 49               | YP_007392456.1 | 93              | tail protein; phage lambda gpL-like            |
| 58    | AEY99479.1   | 735                     | 48   | YP_950472.1  | 98              | 52               | YP_007392459.1 | 96              | central fibre                                  |
| 59    | AEY99482.1   | 383                     | 49   | YP_950473.1  | 86              | 53               | YP_007392460.1 | 98              | DUF2793 domain containing protein <sup>3</sup> |

<sup>1</sup>These proteins were detected by mass spectrometry in purified JBD88a phage particles. Mass spectrometry was performed on this phage because its yield of pure particles was higher than the other phages.

<sup>2</sup>Functions were assigned by BLAST searches and HHpred predictions.

<sup>3</sup>Similarity with DMS3 is only in the first 150 residues. The C-terminal domains are totally distinct.
